RESEARCH ARTICLE

# Similar white matter changes in schizophrenia and bipolar disorder: A tract-based spatial statistics study

Letizia Squarcina<sup>1</sup>, Marcella Bellani<sup>2</sup>, Maria Gloria Rossetti<sup>3</sup>, Cinzia Perlini<sup>4</sup>, Giuseppe Delvecchio<sup>5</sup>, Nicola Dusi<sup>2</sup>, Marco Barillari<sup>5</sup>, Mirella Ruggeri<sup>2</sup>, Carlo A. Altamura<sup>6</sup>, Alessandra Bertoldo<sup>7</sup>, Paolo Brambilla<sup>6,8\*</sup>

**1** IRCCS “E. Medea” Scientific Institute, Bosisio Parini, Lecco, Italy, **2** Section of Psychiatry, AOUI Verona, Verona, Italy, **3** Section of Psychiatry, Department of Neurosciences, Biomedicine and Movement Sciences, University of Verona, Verona, Italy, **4** Section of Clinical Psychology, Department of Neurosciences, Biomedicine and Movement Sciences, Verona, Italy, **5** Department of Radiology, University of Verona, Verona, Italy, **6** Department of Neurosciences and Mental Health, Fondazione IRCCS Ca’ Granda Ospedale Maggiore Policlinico, University of Milan, Milan, Italy, **7** Department of Information Engineering (DEI), University of Padova, Padova, Italy, **8** Department of Psychiatry and Behavioral Sciences, UTHouston Medical School, Houston, Texas, United States of America

\* [paolo.brambilla1@unimi.it](mailto:paolo.brambilla1@unimi.it)

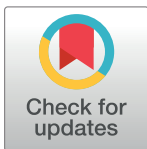

**OPEN ACCESS**

**Citation:** Squarcina L, Bellani M, Rossetti MG, Perlini C, Delvecchio G, Dusi N, et al. (2017) Similar white matter changes in schizophrenia and bipolar disorder: A tract-based spatial statistics study. *PLoS ONE* 12(6): e0178089. <https://doi.org/10.1371/journal.pone.0178089>

**Editor:** Dewen Hu, National University of Defense Technology College of Mechatronic Engineering and Automation, CHINA

**Received:** September 13, 2016

**Accepted:** May 7, 2017

**Published:** June 28, 2017

**Copyright:** © 2017 Squarcina et al. This is an open access article distributed under the terms of the [Creative Commons Attribution License](https://creativecommons.org/licenses/by/4.0/), which permits unrestricted use, distribution, and reproduction in any medium, provided the original author and source are credited.

**Data Availability Statement:** The dataset is available and submitted as a Supporting Information file.

**Funding:** This study was partly supported by grants from the Ministry of Health (GR-2010-2316745) to Paolo Brambilla (GR-2010-2316745) and to Marcella Bellani (GR-2010-2319022).

**Competing interests:** The authors have declared that no competing interests exist.

## Abstract

Several strands of evidence reported a significant overlapping, in terms of clinical symptoms, epidemiology and treatment response, between the two major psychotic disorders—Schizophrenia (SCZ) and Bipolar Disorder (BD). Nevertheless, the shared neurobiological correlates of these two disorders are far from conclusive. This study aims toward a better understanding of possible common microstructural brain alterations in SCZ and BD. Magnetic Resonance Diffusion data of 33 patients with BD, 19 with SCZ and 35 healthy controls were acquired. Diffusion indexes were calculated, then analyzed using Tract-Based Spatial Statistics (TBSS). We tested correlations with clinical and psychological variables. In both patient groups mean diffusion (MD), volume ratio (VR) and radial diffusivity (RD) showed a significant increase, while fractional anisotropy (FA) and mode (MO) decreased compared to the healthy group. Changes in diffusion were located, for both diseases, in the fronto-temporal and callosal networks. Finally, no significant differences were identified between patient groups, and a significant correlations between length of disease and FA and VR within the corpus callosum, corona radiata and thalamic radiation were observed in bipolar disorder. To our knowledge, this is the first study applying TBSS on all the DTI indexes at the same time in both patient groups showing that they share similar impairments in microstructural connectivity, with particular regards to fronto-temporal and callosal communication, which are likely to worsen over time. Such features may represent neural common underpinnings characterizing major psychoses and confirm the central role of white matter pathology in schizophrenia and bipolar disorder.

## Introduction

Several studies consistently reported that Bipolar Disorder (BD) and schizophrenia (SCZ) share clinical, cognitive and genetic aspects [1][2][3][4][5] overcoming the Kraepelinian dichotomy theory [6] which considers BD and SCZ as two distinct diseases. Indeed, in recent years, changes in diffusion measures in BD and SCZ have been investigated under the hypothesis that diffusion alterations, particularly in the white matter (WM), can unveil structural connectivity modifications characterizing major psychoses [7].

In this context, Diffusion Tensor Imaging (DTI) enables the investigation of microstructural alterations in the organization and orientation of WM tracts, through the extraction of specific diffusion indexes interconnected with each other [8][9]. Specifically, fractional anisotropy (FA) measures how much one direction is prevailing on the others inside a particular voxel, whereas mean diffusivity (MD) represents the magnitude of the diffusion. Axial (AD) and radial diffusivity (RD) measure the amount of diffusion that occurs along the principal axis of the diffusion tensor and perpendicularly to it. Volume ratio (VR) gives a measure of the ratio between the ellipsoid volume and that of a sphere having a radius equivalent to the mean diffusivity. Finally, mode (MO) [10], is related to the three-dimensional characteristics of anisotropy (from linear to planar). The analysis of these indexes provides insight into WM microstructural alterations.

Several studies observed similar alterations in cortical areas in SCZ and BD, within prefrontal, temporal and parietal lobes [11][12][13][14][15] and in subcortical regions, including the amygdala, the basal ganglia and the thalamus [16][17][18][14][19]. Furthermore, SCZ and BD have both been considered as “dysconnection syndromes” [20][21][22], being the symptoms sustained by abnormal regional interactions. However, SCZ has been investigated using DTI more widely than BD [12], both at region of interest (ROI) and at a voxel level. In particular, it has been reported that SCZ patients showed widespread lowered FA compared to healthy subjects in several brain regions, including frontal and parietal WM [11][12], internal capsule [23][24], temporal and occipital WM [11], corpus callosum [23][25][26], longitudinal fasciculus [27][28], anterior cingulate bundle [29] and uncinate fasciculus [27]. Additionally, changes were found also in terms of increased RD in the temporal gyrus [30] and increased MD in fronto-temporal areas [11], corpus callosum [31], amygdala [32], and thalamus [33].

With regard to BD, findings are not always in agreement, as suggested by previous studies from our group [34][35] and other independent studies [36][37]. Nonetheless, the majority of these studies detected a decrease in FA, which could be related to disruption of WM. Furthermore, similarly to SCZ, decreased FA was found in BD, both at ROI and at a voxel level, in various WM regions, including frontal WM tracts [38], corona radiata [39], anterior cingulum [40], corpus callosum and arcuate and uncinate fasciculi [36][41]. Although other DTI indexes are less investigated than FA, an increase in MD has been found in WM tracts [7][42] and in the frontal gyri [43], whereas increases in AD and RD have been reported in the fornix [44].

Finally, TBSS (Tract—Based Spatial Statistics [45]) studies also showed an involvement of all major WM tracts [46], located in the frontal, temporal [36][47][48], parietal and occipital WM areas [49] as well as corpus callosum and longitudinal fasciculus [50][51].

Despite the similarities in WM alterations in either BD or SCZ, these two psychiatric illnesses have rarely been studied together in terms of brain diffusion. In most cases no differences were found [13][37][49][52][53], except for a DTI study carried out by Lu and colleagues [54] reporting reduced FA in BD in selective ROIs, including the cingulum, internal capsule, posterior corpus callosum, posterior thalamic radiation and inferior longitudinal fasciculus/inferior fronto-occipital fasciculus WM compared to SCZ. Moreover, a recent TBSS study reported similar WM connectivity abnormalities in callosal, paralimbic and fronto-

occipital regions in both SCZ and BD and also that dysconnectivity predicted functional outcome in both illnesses [49].

In this work we aim to delineate common and distinct WM abnormalities between BD and SCZ patients. Specifically, we directly compared BD, SCZ and healthy controls (HC) taking into account the whole set of DTI indexes simultaneously. This approach, differently from previous studies, where mostly FA and MD are analyzed, provides a comprehensive insight on the changes in diffusion characterizing BD and SCZ. Specifically, in respect to Kumar and colleagues [49], who also compared BD and SCZ with TBSS, we specifically aimed at finding regions where all diffusion indexes are compromised, instead of comparing other indexes where FA shows differences between healthy and patients, with the intent of exploiting all the information we can get with the DTI model.

To our knowledge, this is the first study applying TBSS on all the DTI indexes at the same time. Finally, the impact of age and clinical variables on diffusion values for both groups of patients was explored.

## Materials and methods

### Participants

Thirty-three patients with DSM-IV BD (18 type I, 15 type 2), 19 patients with SCZ and 35 HC were recruited. The recruitment of patients was made by means of the South-Verona Psychiatric Care Register (PCR) [55], a community-based mental health register. Diagnoses for SCZ and BD were obtained using the Item Group Checklist of the Schedule for Clinical Assessment in Neuropsychiatry (IGC-SCAN) (World Health Organization, 1992) and confirmed by the clinical consensus of two staff psychiatrists. The duration of illness was determined in years since symptoms onset. The clinical symptomatology was evaluated with the Brief Psychiatric Rating Scale (BPRS) in both disorders as well as with the Hamilton Depression Rating Scale (HDRS) and the Bech-Rafaelsen Mania Rating Scale (BRMRS) in patients with BD. All patients with other Axis I disorders, alcohol or substance abuse, history of traumatic head injury with loss of consciousness, epilepsy or other neurological or medical diseases, including hypertension and diabetes, were excluded from the study.

HC were recruited through word of mouth and advertisements in the local communities and had no history of head injury or psychiatric disorders, no psychiatric disorders among first-degree relatives, and no history of substance or alcohol abuse. The absence of psychiatric disorders was tested using an interview modified from the non-patient version of the SCID-IV. For all demographic and clinical details please refer to [Table 1](#).

All the procedures were approved by the Biomedical Ethics Committee of the Azienda Ospedaliera di Verona and are in accordance with the Helsinki Declaration of 1975. All subjects signed a written informed consent to the protocol.

### MRI scanning

DTI images were acquired with a 1.5 T Siemens Symphony (Siemens Healthcare, Erlangen, Germany) scanner along 12 non-collinear directions with a single non-diffusion weighted image  $S_0$ . The parameters used for the acquisition were as follows: repetition time (TR) = 8900 ms, echo time (TE) = 104 ms, matrix size 256 x 256x50, voxel size 0.92 x 0.92 x 3 mm<sup>3</sup>, b = 1000 s/mm<sup>2</sup>.

### Data analysis

Distortions due to eddy currents and small head motion were corrected aligning the diffusion-weighted images to the  $S_0$  using affine transformations utilizing the eddy currents correction

**Table 1. Demographic and clinical details of subjects participating to the study.**

|                                                             | Healthy controls<br>(N = 35) | Patients with Bipolar Disorder<br>(N = 33, 18 BD I, 15 BD II) | Patients with Schizophrenia<br>(N = 19) |
|-------------------------------------------------------------|------------------------------|---------------------------------------------------------------|-----------------------------------------|
|                                                             | Mean (SD)                    | Mean (SD)                                                     | Mean (SD)                               |
| Age (years, mean(SD))                                       | 39.0 (12.6)                  | 48.9 (8.3)                                                    | 46.1 (11.5)                             |
| Sex (males/females)*                                        | 19/16                        | 8/25                                                          | 13/6                                    |
| Duration of illness (years, mean(SD))                       | -                            | 20.8 (10.5)                                                   | 20.8 (12.6)                             |
| BPRS total score (mean(SD))                                 | -                            | 33.0 (8.3)                                                    | 34.3 (6.7)                              |
| HDRS total score (mean(SD))                                 | -                            | 11.5 (11.8)                                                   | -                                       |
| BRMRS total score (mean(SD))                                | -                            | 3.1 (4.4)                                                     | -                                       |
| Psychotic symptoms (yes/no)                                 | -                            | 20/13                                                         | 19/0                                    |
| Number of hospitalizations (mean(SD))                       | -                            | 5.3 (4.8)                                                     | 4.1 (4.9)                               |
| Medication                                                  |                              |                                                               |                                         |
| AP typical (chlorpromazine equivalents, yes/no, mean(SD))*  | -                            | 15/18 99.2 (104.1)                                            | 7/12 68.4 (41.6)                        |
| AP atypical (chlorpromazine equivalents, yes/no, mean(SD))* | -                            | 7/26 255.0 (142.0)                                            | 12/7 280.6 (123.8)                      |
| AD (PDD/DDD, yes/no, mean(SD))                              | -                            | 13/20 1.64 (0.63)                                             | 9/10 1.16 (0.65)                        |
| BZD (PDD/DDD, yes/no, mean(SD))*                            | -                            | 12/21 2.42 (3.84)                                             | 9/10 3.83 (4.87)                        |
| STAB (PDD/DDD, yes/no, mean(SD))*                           | -                            | 11/22 0.91 (0.24)                                             | 0/19                                    |

Demographic and clinical details of our sample. BD = bipolar disorder; SD = standard deviation; BPRS = Brief Psychiatric Rating Scale; HDRS = Hamilton Depression Rating Scale; BRMRS = Bech-Rafaelsen Mania Rating Scale; AP = Antipsychotics; AD = Antidepressants; BZD = benzodiazepines; STAB = Mood stabilizers.

\*gender significantly different between samples (Chi-squared test,  $p < 0.05$ ).

<https://doi.org/10.1371/journal.pone.0178089.t001>

tool from FSL [56][57]. The images were then skull-stripped using the brain extraction tool of FSL [58] for all the subjects. Subsequently, the data were fitted to the tensor model, as implemented in the function FDT in FSL [59][60], and FA, MD, RD, RA, and VR indexes were obtained. MO was calculated with an in-house MatLab script (MATLAB R2011b, The Math-Works Inc., Natick, MA, 2011) according to the work of Ennis and colleagues [10].

Patients were divided into two distinct groups according to the diagnosis. We compared age and gender between groups. We investigated differences in diffusion between patients affected by BD HC, and between patients affected by SCZ and HC. We also investigated if there were differences, in terms of diffusion, between BD I and BD II patients. Then, we compared SCZ with BD.

TBSS consists in various steps. Briefly, all FA images from all subjects were non-linearly registered to the FMRIB-FA standard space using FNIRT [61] and a mean FA image was created. Then, the center of the WM tracts were delineated by thinning, to obtain a “skeleton” representing the brain WM tracts common to all subjects belonging to the group. The resulting data were processed applying voxel-wise cross-subject statistics, using FSL randomise function [62] ( $p < 0.05$ ). We corrected the results for multiple comparisons using threshold-free cluster enhancement (TFCE [63]), an approach similar to cluster-based thresholding. Age was treated as a nuisance variable to avoid spurious results related with the natural changes in diffusion associated with aging. Also gender was considered as a covariate of no interest. Moreover, mean values and standard deviations of the considered diffusion indexes in the affected WM tracts, identified using the JHU ICBM-DTI-81 (<http://cmrm.med.jhmi.edu/>) tract atlas, have been compared with the healthy population. We tested if diffusion indexes came from different statistical populations, using the Wilcoxon-Mann-Whitney rank-sum test ( $p = 0.05$ ) for both comparisons.

We then investigated if there were areas or clusters of voxels where all diffusion indexes showed abnormal behavior simultaneously. To achieve this, the results obtained with the different indexes have been intersected, considering the voxels where the differences between healthy subjects and patients were statistically significant ( $p < 0.05$ ) for each index.

Finally, we investigated if diffusion indexes variations in the pathological population correlated with the duration of illness, use of medication, BPRS, HDRS and BRMRS score in the case of BD, and with length of disease, BPRS scores, medication and number of hospitalizations in SCZ subjects. Also in this case results were corrected for multiple comparisons considering only voxels with  $p < 0.05$ , identified using TFCE.

## Results

We found widespread white matter alterations both in BD and in SCZ. In particular, FA decreased, while MD, VR, AD and RD increased in both groups of patients in respect to healthy controls (TFCE,  $p < 0.05$ ). In BD patients MO showed a decrease in small regions. The affected areas overlap substantially in BD and SCZ. In a direct comparison between BD and SCZ and between BD I and BD II no differences have been found in diffusion indexes (TFCE,  $p > 0.05$ ). Gender differed between samples (Chi-squared test,  $p < 0.05$ ), while age did not show a significant difference (Wilcoxon rank-sum test,  $p > 0.05$ ).

### Direct comparisons of patients affected by SCZ and BD with HC

**SCZ vs HC.** For patients with SCZ, after multiple comparison correction (TFCE,  $p = 0.05$ ) FA showed a decrease in respect to HC, while MD, VR, AD and RD showed an increase in widespread WM areas, including corpus callosum, corona radiata, longitudinal fasciculus, internal and external capsule, thalamic radiation (values in [Table 2](#)). Coherently, the Wilcoxon rank-sum test identified all indexes values to be different in all tracts ([Table 2](#)).

Areas where FA, MD, VR, AD and RD differ from HC are corpus callosum, right anterior thalamic radiation, left posterior thalamic radiation, superior and posterior corona radiata, longitudinal fasciculus ([Fig 1](#)).

**BD vs HC.** In BD patients FA, MD, VR, AD, MO and RD showed, after correction for multiple comparisons (TFCE,  $p = 0.05$ ), significant differences (mean values in [Table 3](#)) in many areas, including bilateral internal capsule and corpus callosum, bilateral external capsule, corona radiata, internal capsule and longitudinal fasciculus. Additionally, MO decreased only in small areas located in the corpus callosum and in the internal capsule.

Due to the small amount of voxels where MO was found to be sensitive to pathology, we did not consider MO in the computation of the areas which showed a variation of all indexes simultaneously. FA, MD, VR, AD and RD showed significant changes in respect to HC in particular in the corpus callosum, external capsule and internal capsule ([Fig 2](#)).

**BD vs SCZ.** The direct comparison between the two groups of patients, after correction for multiple comparisons, did not show statistically relevant differences. Also, no differences in diffusion indexes were found between BD I and BD II patients.

### 2. Correlations of diffusion values of patients affected by SCZ and BD with clinical indexes

In patients affected by SCZ, we did not find any statistically significant correlation with clinical variables after multiple comparison correction (TFCE,  $p = 0.05$ ).

In patients affected by BD, length of illness showed statistically significant negative correlations with FA in internal and external capsule and corona radiata as well as positive correlations

**Table 2. Brain areas where diffusion indexes are different in schizophrenia patients in respect to healthy controls.**

| <b>FA</b>                   |                            |                            |                     |
|-----------------------------|----------------------------|----------------------------|---------------------|
| <b>Tract</b>                | <b>SCZ patients</b>        | <b>Healthy controls</b>    | <b>rank-sum (p)</b> |
|                             | mean (SD) x10 <sup>2</sup> | mean (SD) x10 <sup>2</sup> |                     |
| Corpus callosum             | 0.70 (0.12)                | 0.73 (0.12)                | <10 <sup>-3</sup>   |
| Corona radiata L            | 0.51 (0.10)                | 0.53 (0.099)               | <10 <sup>-3</sup>   |
| Corona radiata R            | 0.51 (0.098)               | 0.53 (0.095)               | <10 <sup>-3</sup>   |
| Longitudinal fasciculus L   | 0.51 (0.097)               | 0.53 (0.099)               | <10 <sup>-3</sup>   |
| Longitudinal fasciculus R   | 0.51 (0.095)               | 0.53 (0.099)               | <10 <sup>-3</sup>   |
| External capsule L          | 0.46 (0.11)                | 0.48 (0.11)                | <10 <sup>-3</sup>   |
| External capsule R          | 0.47 (0.11)                | 0.48 (0.11)                | <10 <sup>-3</sup>   |
| Thalamic radiation L        | 0.62 (0.10)                | 0.65 (0.11)                | <10 <sup>-3</sup>   |
| Thalamic radiation R        | 0.62 (0.10)                | 0.65 (0.11)                | <10 <sup>-3</sup>   |
| <b>MD</b>                   |                            |                            |                     |
| <b>Tract</b>                | <b>SCZ patients</b>        | <b>Healthy controls</b>    | <b>rank-sum (p)</b> |
|                             | mean (SD) x10 <sup>4</sup> | mean (SD) x10 <sup>4</sup> |                     |
| Corpus callosum             | 8.17 (2.23)                | 7.63 (1.26)                | <10 <sup>-3</sup>   |
| Corona radiata L            | 7.40 (0.94)                | 7.18 (0.85)                | <10 <sup>-3</sup>   |
| Corona radiata R            | 7.43 (0.50)                | 7.17 (0.83)                | <10 <sup>-3</sup>   |
| Internal capsule L          | 7.31 (0.81)                | 7.19 (0.77)                | <10 <sup>-3</sup>   |
| Internal capsule R          | 7.37 (1.07)                | 7.22 (0.79)                | <10 <sup>-3</sup>   |
| Longitudinal fasciculus L   | 7.25 (0.80)                | 7.02 (0.76)                | <10 <sup>-3</sup>   |
| Longitudinal fasciculus R   | 7.29 (0.84)                | 7.05 (0.80)                | <10 <sup>-3</sup>   |
| External capsule L          | 7.82 (0.83)                | 7.63 (0.76)                | <10 <sup>-3</sup>   |
| External capsule R          | 7.77 (0.84)                | 7.64 (0.75)                | <10 <sup>-3</sup>   |
| Thalamic radiation L        | 8.23 (1.41)                | 7.72 (1.42)                | <10 <sup>-3</sup>   |
| Thalamic radiation R        | 8.22 (2.69)                | 7.60 (1.30)                | <10 <sup>-3</sup>   |
| <b>VR</b>                   |                            |                            |                     |
| <b>Tract</b>                | <b>SCZ patients</b>        | <b>Healthy controls</b>    | <b>rank-sum (p)</b> |
|                             | mean (SD)                  | mean (SD)                  |                     |
| Corpus callosum             | 0.44 (0.19)                | 0.41 (0.19)                | <10 <sup>-3</sup>   |
| Longitudinal fasciculus R L | 0.70 (0.11)                | 0.67 (0.12)                | <10 <sup>-3</sup>   |
| External capsule L          | 0.76 (0.12)                | 0.74 (0.12)                | <10 <sup>-3</sup>   |
| External capsule R          | 0.75 (0.12)                | 0.74 (0.12)                | <10 <sup>-3</sup>   |
| <b>AD</b>                   |                            |                            |                     |
| <b>Tract</b>                | <b>SCZ patients</b>        | <b>Healthy controls</b>    | <b>rank-sum (p)</b> |
|                             | mean (SD) x10 <sup>3</sup> | mean (SD)                  |                     |
| Corpus callosum             | 1.74 (0.48)                | 1.69 (0.45)                | <10 <sup>-3</sup>   |
| Internal capsula R          | 1.35 (0.15)                | 1.34 (0.15)                | <10 <sup>-3</sup>   |
| Corona radiata L            | 1.26 (0.21)                | 1.23 (0.17)                | <10 <sup>-3</sup>   |
| Corona radiata R            | 1.27 (0.21)                | 1.23 (0.18)                | <10 <sup>-3</sup>   |
| <b>RD</b>                   |                            |                            |                     |
| <b>Tract</b>                | <b>SCZ patients</b>        | <b>Healthy controls</b>    | <b>rank-sum (p)</b> |
|                             | mean (SD) x10 <sup>4</sup> | mean (SD) x10 <sup>4</sup> |                     |
| Corpus callosum             | 3.96 (1.57)                | 3.57 (1.47)                | <10 <sup>-3</sup>   |
| Corona radiata L            | 5.16 (1.03)                | 4.85 (0.95)                | <10 <sup>-3</sup>   |
| Corona radiata R            | 5.15 (0.97)                | 4.83 (0.91)                | <10 <sup>-3</sup>   |
| Internal capsule L          | 4.25 (0.94)                | 4.11 (0.93)                | <10 <sup>-3</sup>   |

(Continued)



**Table 2.** (Continued)

|                           |             |             |            |
|---------------------------|-------------|-------------|------------|
| Internal capsule R        | 4.24 (0.97) | 4.12 (0.95) | $<10^{-3}$ |
| Longitudinal fasciculus L | 5.03 (0.84) | 4.76 (0.81) | $<10^{-3}$ |
| Longitudinal fasciculus R | 5.05 (0.84) | 4.79 (0.84) | $<10^{-3}$ |
| External capsule L        | 5.70 (1.06) | 5.45 (1.02) | $<10^{-3}$ |
| External capsule R        | 5.65 (1.07) | 5.45 (1.01) | $<10^{-3}$ |
| Thalamic radiation L      | 4.91 (1.35) | 4.42 (1.44) | $<10^{-3}$ |
| Thalamic radiation R      | 4.59 (1.32) | 4.24 (1.32) | $<10^{-3}$ |

Brain areas where diffusion indexes are statistically different between patients affected by schizophrenia and healthy controls, mean and standard deviations of their values (FA = fractional anisotropy, MD = mean diffusivity, VR volume ratio, RD = radial diffusivity, L = left, R = right, SD = standard deviation) and results of the Wilcoxon rank-sum test.

<https://doi.org/10.1371/journal.pone.0178089.t002>

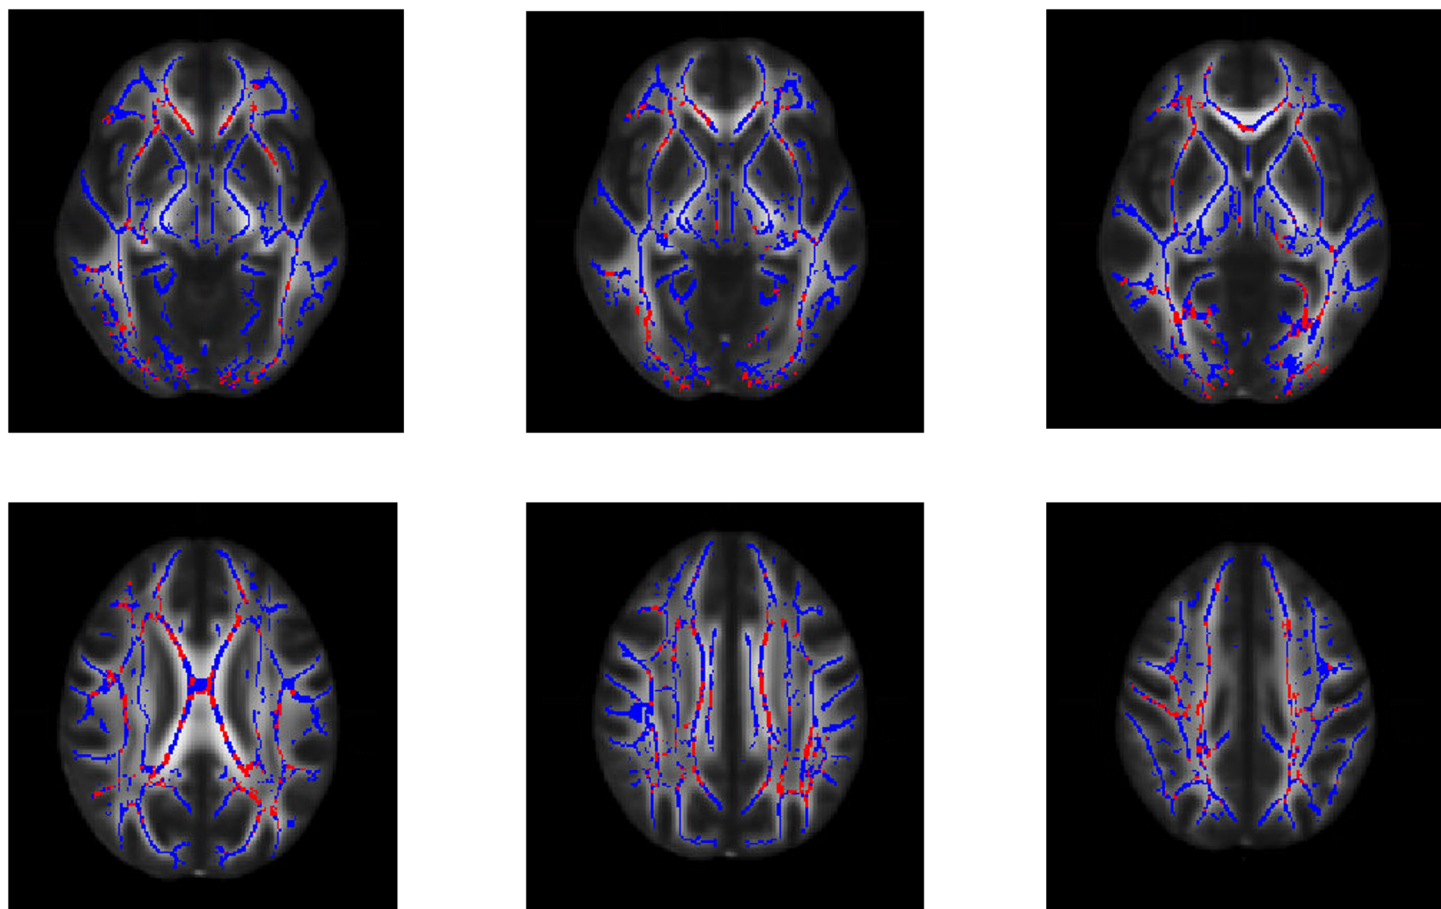

**Fig 1. Areas with multiple altered DTI indexes in schizophrenia.** White Matter tracts areas where fractional anisotropy, mean diffusivity, axial diffusivity, volume ratio and radial diffusivity show all a significant change in patients affected by schizophrenia, in respect to healthy individual (in red,  $p = 0.05$ , corrected with threshold-free cluster enhancement). Areas where all the considered indexes differ from values of healthy controls are corpus callosum, corona radiata, superior longitudinal fasciculus. The white matter skeleton is depicted in blue.

<https://doi.org/10.1371/journal.pone.0178089.g001>

**Table 3. Brain areas where diffusion indexes are different in bipolar disorder patients in respect to healthy controls.**

| FA                          |                            |                            |                   |
|-----------------------------|----------------------------|----------------------------|-------------------|
| Tract                       | BD patients                | Healthy controls           | rank-sum (p)      |
|                             | mean (SD) x10 <sup>2</sup> | mean (SD) x10 <sup>2</sup> |                   |
| Corpus callosum             | 0.69 (0.13)                | 0.73 (0.12)                | <10 <sup>-3</sup> |
| Corona radiata L            | 0.49 (0.097)               | 0.53 (0.099)               | <10 <sup>-3</sup> |
| Corona radiata R            | 0.50 (0.098)               | 0.53 (0.095)               | <10 <sup>-3</sup> |
| Internal capsule L          | 0.63 (0.095)               | 0.65 (0.094)               | <10 <sup>-3</sup> |
| Internal capsule R          | 0.63 (0.093)               | 0.65 (0.095)               | <10 <sup>-3</sup> |
| Longitudinal fasciculus L   | 0.51 (0.098)               | 0.53 (0.099)               | <10 <sup>-3</sup> |
| Longitudinal fasciculus R   | 0.51 (0.099)               | 0.53 (0.099)               | <10 <sup>-3</sup> |
| MD                          |                            |                            |                   |
| Tract                       | BD patients                | Healthy controls           | rank-sum (p)      |
|                             | mean (SD) x10 <sup>4</sup> | mean (SD) x10 <sup>4</sup> |                   |
| Corpus callosum             | 8.13 (1.51)                | 7.63 (1.26)                | <10 <sup>-3</sup> |
| Corona radiata L            | 7.50 (0.93)                | 7.18 (0.85)                | <10 <sup>-3</sup> |
| Corona radiata R            | 7.49 (0.92)                | 7.17 (0.83)                | <10 <sup>-3</sup> |
| Internal capsule L          | 7.39 (0.85)                | 7.19 (0.77)                | <10 <sup>-3</sup> |
| Internal capsule R          | 7.43 (0.83)                | 7.22 (0.79)                | <10 <sup>-3</sup> |
| Longitudinal fasciculus L   | 7.24 (0.76)                | 7.02 (0.76)                | <10 <sup>-3</sup> |
| Longitudinal fasciculus R   | 7.29 (0.78)                | 7.05 (0.80)                | <10 <sup>-3</sup> |
| External capsule L          | 7.84 (0.81)                | 7.63 (0.76)                | <10 <sup>-3</sup> |
| External capsule R          | 7.74 (0.79)                | 7.64 (0.75)                | <10 <sup>-3</sup> |
| Thalamic radiation L        | 8.18 (.1.37)               | 7.72 (1.42)                | <10 <sup>-3</sup> |
| Thalamic radiation R        | 8.21 (2.57)                | 7.60 (1.30)                | <10 <sup>-3</sup> |
| VR                          |                            |                            |                   |
| Tract                       | BD patients                | Healthy controls           | rank-sum (p)      |
|                             | mean (SD)                  | mean (SD)                  |                   |
| Corpus callosum             | 0.47 (0.20)                | 0.41 (0.19)                | <10 <sup>-3</sup> |
| Corona radiata L            | 0.73 (0.11)                | 0.68 (0.12)                | <10 <sup>-3</sup> |
| Corona radiata R            | 0.72 (0.11)                | 0.68 (0.12)                | <10 <sup>-3</sup> |
| Longitudinal fasciculus R L | 0.70 (0.12)                | 0.68 (0.12)                | <10 <sup>-3</sup> |
| External capsule L          | 0.77 (0.12)                | 0.74 (0.12)                | <10 <sup>-3</sup> |
| External capsule R          | 0.76 (0.12)                | 0.73 (0.12)                | <10 <sup>-3</sup> |
| Cingulum L                  | 0.65 (0.13)                | 0.59 (0.15)                | <10 <sup>-3</sup> |
| AD                          |                            |                            |                   |
| Tract                       | BD patients                | Healthy controls           | rank-sum (p)      |
|                             | mean (SD) x10 <sup>3</sup> | mean (SD) x10 <sup>3</sup> |                   |
| Corona radiata R            | 1.20 (0.16)                | 1.19 (0.15)                | <10 <sup>-3</sup> |
| Longitudinal fasciculus R   | 1.18 (0.17)                | 1.16 (0.18)                | <10 <sup>-3</sup> |
| Internal capsule R          | 1.35 (0.16)                | 1.34 (0.15)                | <10 <sup>-3</sup> |
| RD                          |                            |                            |                   |
| Tract                       | BD patients                | Healthy controls           | rank-sum (p)      |
|                             | mean (SD) x10 <sup>4</sup> | mean (SD) x10 <sup>4</sup> |                   |
| Corpus callosum             | 4.21 (1.73)                | 3.57 (1.47)                | <10 <sup>-3</sup> |
| Corona radiata L            | 5.30 (1.01)                | 4.85 (0.95)                | <10 <sup>-3</sup> |
| Corona radiata R            | 5.25 (1.00)                | 4.83 (0.91)                | <10 <sup>-3</sup> |
| Internal capsule L          | 4.35 (0.99)                | 4.11 (0.93)                | <10 <sup>-3</sup> |

(Continued)



**Table 3.** (Continued)

| Internal capsule R        | 4.38 (0.97) | 4.13 (0.95)      | <10 <sup>-3</sup> |
|---------------------------|-------------|------------------|-------------------|
| Longitudinal fasciculus L | 5.05 (0.84) | 4.76 (0.81)      | <10 <sup>-3</sup> |
| Longitudinal fasciculus R | 5.05 (0.87) | 4.79 (0.84)      | <10 <sup>-3</sup> |
| <b>MO</b>                 |             |                  |                   |
| Tract                     | BD patients | Healthy controls | rank-sum (p)      |
|                           | mean (SD)   | mean (SD)        |                   |
| Corpus callosum           | 0.86 (0.18) | 0.88 (0.16)      | <10 <sup>-3</sup> |

Brain areas where diffusion indexes are statistically different between patients affected by bipolar disorder and healthy controls, mean and standard deviations of their values ((FA = fractional anisotropy, MD = mean diffusivity, VR volume ratio, RD = radial diffusivity, MO = mode, L = left, R = right, SD = standard deviation) and results of the Wilcoxon rank-sum test.

<https://doi.org/10.1371/journal.pone.0178089.t003>

with VR in internal and external capsule, corona radiata, corpus callosum (S1 Table, S1 and S2 Figs).

## Discussion

In this work, we have taken into account the whole set of DTI indexes (FA, MD, VR, RD, AD and MO), with the aim of reaching a comprehensive understanding of brain diffusion in BD and SCZ. Diffusion resulted to be affected both in BD and in SCZ patients, whereas no significant differences were found between the two groups of patients. In particular, patients suffering from BD and SCZ showed widespread reduction of FA and a significant increase in all the other indexes in all major WM connections compared to healthy subjects. Only for patients affected by SCZ, AD did not show significant differences when compared with HC.

These results suggest that the alterations underlying the pathophysiology of SCZ and BD are similar when structural connectivity, in terms of diffusion of water in the brain, is considered. Specifically, in this study, BD and SCZ patients showed similar dysfunctional patterns in MD and FA values, in respect to HC, further suggesting that structural connectivity is similarly affected in these two diseases, in line with previous findings [7][11][27][30][49][64].

It is to be noted that more than half BD patients who took part to this study have a lifetime history of psychosis. Psychotic symptoms have recently been seen as representing an intermediate phenotype between bipolar disorder with no psychotic symptoms and schizophrenia [65; 66; 67]: this could partly explain our results. Interestingly, as can be seen in Table 1, medication intake is similar in the two patient groups, thus this should not add any major bias to our findings.

Indeed, FA and MD have been found to decrease in both groups of patients in many brain areas, especially in prefrontal cortex (PFC), corpus callosum, corona radiata, longitudinal fasciculi and internal capsule [11][49]. Moreover, a relationship between the alteration of those tracts and specific cognitive profiles has been largely reported in both disorders [39][68][69][70][71]. In particular, Karbasforoushan and colleagues [68] found that decreases in the integrity of corpus callosum, cingulum, superior and inferior frontal gyri, and precuneus, are related with processing speed impairment, whereas Bauer and colleagues [39] showed that BD patients with alterations of FA, RD and MD within the internal capsule, the superior and anterior corona radiata, and the corpus callosum had low performances on verbal fluency tasks.

Similarly, emotional and cognitive processes involved in SCZ have been linked to modifications in the internal capsule and its fronto-thalamic network [24][37][72], potentially supporting dysfunctional connectivity and altered executive functions [69].

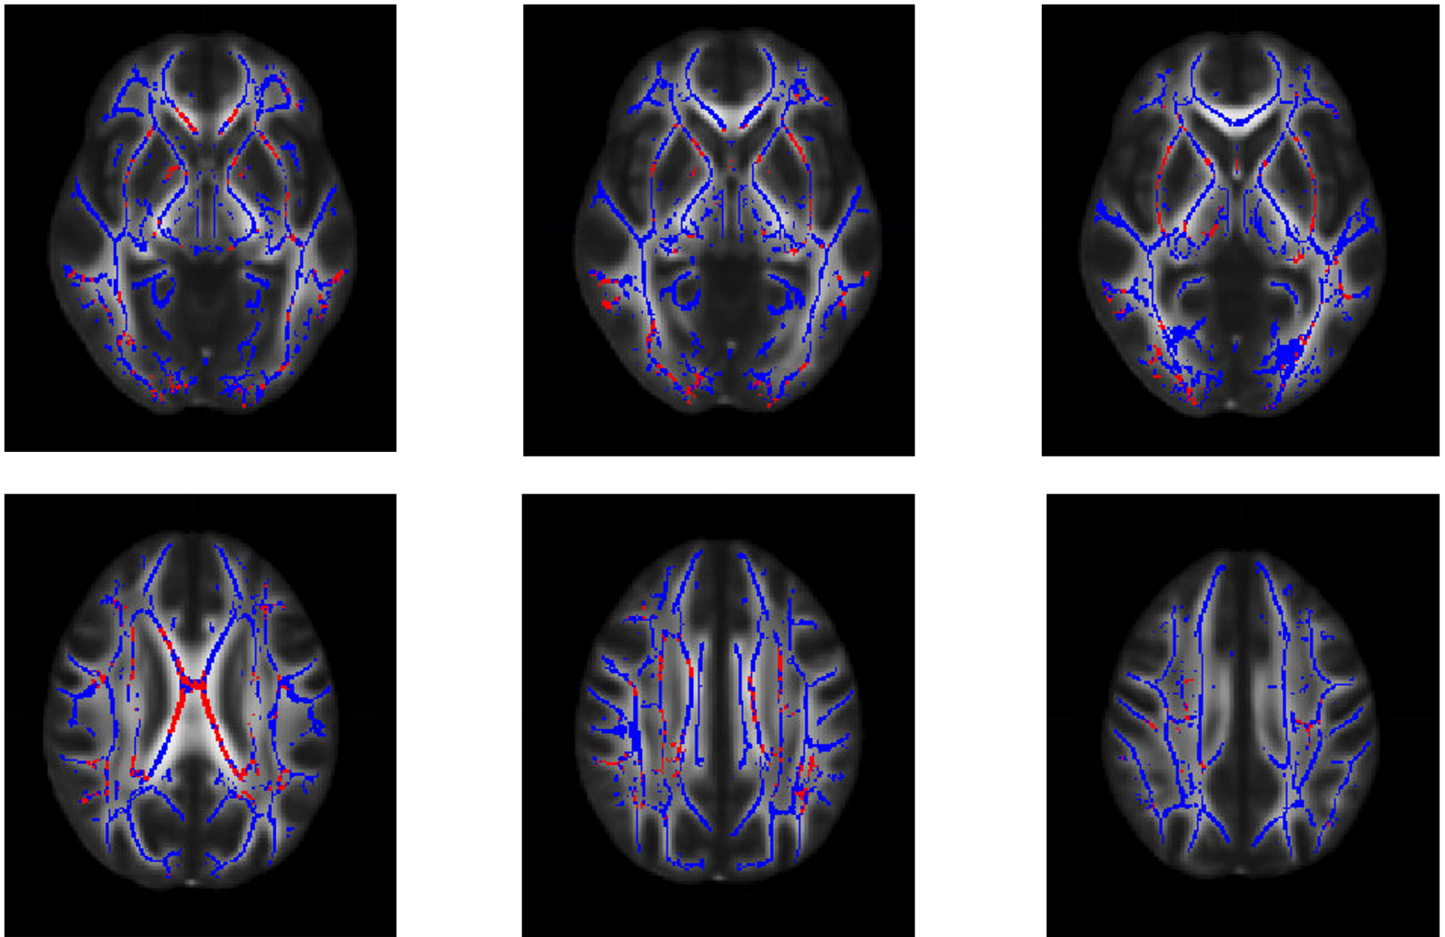

**Fig 2. Areas with multiple altered DTI indexes in bipolar disorder.** White matter tracts areas where fractional anisotropy, mean diffusivity, volume ratio, axial diffusivity and radial diffusivity show all a significant change in respect to healthy individual (in red,  $p = 0.05$ , corrected with threshold-free cluster enhancement) in patients with bipolar disorder. It can be noted that clusters of voxels, located in particular in the corpus callosum, in the external capsule and internal capsule show abnormalities in all the considered diffusion indexes. The white matter skeleton is depicted in blue.

<https://doi.org/10.1371/journal.pone.0178089.g002>

Moreover, a decrease in FA, coupled with the increase in MD, RD and VR, which has been found in both SCZ and BD in our sample, could be the consequence of disrupted brain connections and/or demyelination [9]. Increases in AD, VR, MD, observed in BD, might indicate that the structure of tissues is damaged, with a consequent impact on the boundaries needed for the diffusion. These findings are in line with a previous work from our research network [50], which reported a decrease in FA and an increase in MD and AD in an independent group of patients with BD. Furthermore, a decrease in FA coupled with an increase in RD observed in corpus callosum, thalamic radiation, corona radiata in SCZ, and in widespread WM areas in BD, could indicate that most damage has been done to myelin sheaths and barriers perpendicular to the main axis of the axons [9]. Finally, an alteration also in AD, as can be seen in our group of BD patients, indicates that damage occurs also along the main direction of diffusion, i.e. along the axons and neural pathways.

Our results also showed a significant WM impairment in corpus callosum in both diseases, which our group already demonstrated in terms of volume reduction and signal intensity in BD [73][74]. These findings confirm that inter-hemispheric connectivity is hindered in both

the disorders [7], representing a common neural underpinning of major psychoses [35][75][76]. The corpus callosum is known to play a fundamental role by modulating inter-hemispheric communication and cognitive processes [77][78]. In particular, the anterior callosal fibers connect the bilateral frontal cortices including the cortices associated with several cognitive domains such as memory, attention, and executive functions [78]. The integrity of the corpus callosum is therefore crucial for sustained attention, context processing and language, which are frequently impaired in BD and SCZ [68][77][79].

Interestingly, we found AD to be higher in BD patients in respect to healthy controls, while no significant differences were found for SCZ patients. These changes, in BD patients, are located particularly in the right fronto-temporal network, in particular in corona radiata, superior longitudinal fasciculus and internal capsule. AD is often associated with axonal integrity [73][80] and it has been previously found increased in both BD and SCZ [30][44][54]. This suggests, especially when coupled with an increase in RD, that water content is augmented outside the axons, mirroring a loss of WM integrity [9]. The fact that we found no evidence in changes in AD for patients with SCZ is also supported by the literature [81][82] and reveals that damage to axons is more evident in BD than in SCZ. In contrast, both diseases are characterized by damage to myelin, proved by increases in diffusion perpendicularly to the main axis of axons, i.e. increases in RD [83].

Our results did not show any significant correlation between psychopathological measures and diffusion in WM tracts, similarly to previous findings [84][85]. However, we found clusters of voxels where the length of disease correlated with FA and VR in bipolar disorder, suggesting that the damage to WM progresses with chronicity. Specifically, the areas where diffusion disruption was related to length of illness were located in the corpus callosum, in external and internal capsule, corona radiata and thalamic radiation. All together, these results suggests that there is a noticeable impairment of inter-hemispheric and fronto-temporal connectivity in BD, particularly worsening with chronicity. Our results may in part be associated to the long duration of illness of our sample, which could have contributed to the changes detected in brain tissue integrity. It is to be noted that in our SCZ sample the correlations were significant before multiple comparison correction, and did not survive the correction, probably due to small sample size. In order to confirm our speculation, longitudinal DTI studies would be needed.

Our findings suffer from two major limitations, which may limit the generalizability of the results. First, the sample size was relatively small and composed by chronic patients, although it was comparable with most of the available recent studies (e.g. [86][87]). Second, this study was conducted with a relatively low resolution DTI acquisition, which, even if it does not affect any of the considerations about water diffusion, could partially detect fine tissue details. Moreover, our dataset was composed of subjects who had a long story of illness that could partially interfere with the results and cause non-specific WM damage. Finally the age at onset of our sample was higher than generally expected, even if similar in the two patient groups.

In conclusion, this study shows, through an extensive analysis of DTI indexes, that BD and SCZ share similar impairments in microstructural connectivity, particularly in fronto-temporal and callosal communication, which also seem to be affected by the progression of the illnesses. Such features may represent neural common underpinnings characterizing major psychoses and confirm the central role of WM pathology in SCZ and BD, adding further evidence for a dimensional continuum of these two disorders in the light of searching for neural biomarkers across the psychosis spectrum [88]. In this perspective, future larger longitudinal studies should explore both structural and functional connectivity in first episode psychotic patients to further characterize the etiology of the two diseases.

## Supporting information

### **S1 Fig. Correlation of fractional anisotropy with length of disease in bipolar disorder.**

Areas where fractional anisotropy values significantly negatively correlate (in red,  $p = 0.05$ , corrected with threshold-free cluster enhancement) with length of disease in patients with bipolar disorder. Some clusters can be identified, located in particular in external capsule and corona radiata. The white matter skeleton is depicted in blue.

(TIF)

**S2 Fig. Correlation of volume ratio with length of disease in bipolar disorder.** Areas where volume ratio values significantly positively correlate ( $p = 0.05$ , corrected with threshold-free cluster enhancement) with length of disease in patients with bipolar disorder. Some clusters can be identified, located in particular in external capsule, corona radiata, corpus callosum and internal capsule.

(TIF)

**S1 Table. White matter structures and DTI indexes which correlate with length of disease in bipolar disorder.** List of white matter structures and DTI indexes which show a significant correlation with length of disease ( $p = 0.05$ , corrected with threshold-free cluster enhancement) in patients affected by bipolar disorder. Indexes which resulted significant in this analysis are fractional anisotropy (FA) and volume ratio (VR) (L = left, R = right).

(DOCX)

**S1 File. List of subjects involved in the study: diagnosis, age, gender and length of disease.**

CNT = healthy control; BD = bipolar disorder; SCZ = schizophrenia; F = female; M = male.

(XLSX)

## Acknowledgments

We thank Gianluca Rambaldelli for managing the dataset.

This study was partly supported by grants from the Ministry of Health to Paolo Brambilla and Letizia Squarcina (RF-2011-02352308) and to Marcella Bellani (GR-2010-2319022).

## Author Contributions

**Conceptualization:** LS M. Bellani AB PB.

**Data curation:** LS.

**Formal analysis:** LS AB.

**Funding acquisition:** PB M. Bellani CA.

**Investigation:** CP ND M. Bellani PB.

**Methodology:** LS AB PB.

**Project administration:** PB M. Bellani.

**Software:** LS.

**Supervision:** PB CA AB M. Bellani MR.

**Writing – original draft:** LS MGR GD.

**Writing – review & editing:** LS MGR GD M. Bellani PB CA AB MR M. Barillari.

## References

1. Altinbas K, Yesilyurt S, Aras HI, Smith DJ, Craddock N. Lifetime hypomanic symptoms in remitted patients with schizophrenia and other psychotic disorders. *Psychiatr Danub*. 2014. 26, 3:200–4. PMID: [25191765](#)
2. Brambilla P, Cerruti S, Bellani M, Perlino C, Ferro A, Marinelli V, et al. Shared impairment in associative learning in schizophrenia and bipolar disorder. *Prog. Neuropsychopharmacol. Biol. Psychiatry*. 2011. 35, 4:1093–9. <https://doi.org/10.1016/j.pnpbp.2011.03.007> PMID: [21420463](#)
3. Kuswanto C. N., Sum M. Y., Sim K. Neurocognitive functioning in schizophrenia and bipolar disorder: clarifying concepts of diagnostic dichotomy vs. continuum. *Neuropsychopharmacology of Psychosis: Relation of Brain Signals, Cognition and Chemistry*. 2015. 17.
4. Lichtenstein P, Yip BH, Björk C, Pawitan Y, Cannon TD, Sullivan PF, et al. Common genetic determinants of schizophrenia and bipolar disorder in Swedish families: a population-based study. *Lancet*. 2009; 373(9659):234–9. [https://doi.org/10.1016/S0140-6736\(09\)60072-6](https://doi.org/10.1016/S0140-6736(09)60072-6) PMID: [19150704](#)
5. Carter CJ. eIF2B and oligodendrocyte survival: where nature and nurture meet in bipolar disorder and schizophrenia? *Schizophr Bull*. 2007; 33(6):1343–53. <https://doi.org/10.1093/schbul/sbm007> PMID: [17329232](#)
6. Heckers S. Making progress in schizophrenia research. *Schizophr Bull*. 2008; 34(4):591–4. <https://doi.org/10.1093/schbul/sbn046> PMID: [18492660](#)
7. Bellani M, Perlino C, Ferro A, Cerruti S, Rambaldelli G, Isola M, et al. White matter microstructure alterations in bipolar disorder. *Funct Neurol*. 2012; 27(1):29–34. PMID: [22687164](#)
8. Basser PJ, Pierpaoli C. Microstructural and physiological features of tissues elucidated by quantitative-diffusion-tensor MRI. *J. Magn Reson B*. 1996; 111(3):209–19. PMID: [8661285](#)
9. Beaulieu C. The basis of anisotropic water diffusion in the nervous system—a technical review. *NMR Biomed*. 2002; 15, 7–8:435–55. <https://doi.org/10.1002/nbm.782> PMID: [12489094](#)
10. Ennis DB, Kindlmann G. Orthogonal tensor invariants and the analysis of diffusion tensor magnetic resonance images. *Mag. Reson Med*. 2006; 55(1):136–46.
11. Anderson D, Ardekani BA, Burdick KE, Robinson DG, John M, Malhotra AK, et al. Overlapping and distinct gray and white matter abnormalities in schizophrenia and bipolar I disorder. *Bipolar Disord*. 2013; 15(6):680–93. <https://doi.org/10.1111/bdi.12096> PMID: [23796123](#)
12. Cui L, Chen Z, Deng W, Huang X, Li M, Ma X, et al. Assessment of white matter abnormalities in paranoid schizophrenia and bipolar mania patients. *Psychiatry Res*. 2011; 194(3):347–53. <https://doi.org/10.1016/j.psychres.2011.03.010> PMID: [22079662](#)
13. Cui L, Li M, Deng W, Guo W, Ma X, Huang C, et al. Overlapping clusters of gray matter deficits in paranoid schizophrenia and psychotic bipolar mania with family history. *Neurosci. Lett*. 2011. 489, 2:94–8. <https://doi.org/10.1016/j.neulet.2010.11.073> PMID: [21138758](#)
14. Yu K, Cheung C, Leung M, Li Q, Chua S, McAlonan G. Are Bipolar Disorder and Schizophrenia Neuroanatomically Distinct? An Anatomical Likelihood Meta-analysis. *Front Hum Neurosci*. 2010 26;4:189.
15. Maggioni E., Bellani M., Altamura A. C., Brambilla P. Neuroanatomical voxel-based profile of schizophrenia and bipolar disorder. *Epidemiology and psychiatric sciences*. 2016. 1–5.
16. Ellison-Wright I., Bullmore E. Anatomy of bipolar disorder and schizophrenia: a meta-analysis. *Schizophrenia research*. 2010. 117(1), 1–12. <https://doi.org/10.1016/j.schres.2009.12.022> PMID: [20071149](#)
17. Gupta CN, Calhoun VD, Rachakonda S, Chen J, Patel V, Liu J, et al. Patterns of Gray Matter Abnormalities in Schizophrenia Based on an International Mega-analysis. *Schizophr Bull*. 2015. 41, 5:1133–42. H. <https://doi.org/10.1093/schbul/sbu177> PMID: [25548384](#)
18. Shenton M. E., Dickey C. C., Frumin M., & McCarley R. W. A review of MRI findings in schizophrenia. *Schizophrenia research*. 2001. 49(1), 1–52.
19. Molina V, Galindo G, Cortés B, de Herrera AG, Ledo A, Sanz J, et al Different gray matter patterns in chronic schizophrenia and chronic bipolar disorder patients identified using voxel-based morphometry. *Eur Arch Psychiatry Clin Neurosci*. 2011. 261, 5:313–22. <https://doi.org/10.1007/s00406-010-0183-1> PMID: [21188405](#)
20. Friston K. J. Schizophrenia and the disconnection hypothesis. *Acta psychiatrica Scandinavica. Supplementum*. 1999. 395, 68.
21. Pettersson-Yeo W, Allen P, Benetti S, McGuire P, Mechelli A. Dysconnectivity in schizophrenia: where are we now? *Neurosci Biobehav Rev*. 2011; 35(5):1110–24. <https://doi.org/10.1016/j.neubiorev.2010.11.004> PMID: [21115039](#)
22. Vai B, Bollettini I, Benedetti F. Corticolimbic connectivity as a possible biomarker for bipolar disorder. *Expert Rev Neurother*. 2014 Jun; 14(6):631–50 <https://doi.org/10.1586/14737175.2014.915744> PMID: [24852228](#)



23. Ellison-Wright I, Nathan PJ, Bullmore ET, Zaman R, Dudas RB, Agius M, et al. Distribution of tract deficits in schizophrenia. *BMC Psychiatry*. 2014; 14:99. <https://doi.org/10.1186/1471-244X-14-99> PMID: [24693962](https://pubmed.ncbi.nlm.nih.gov/24693962/)
24. Levitt JJ, Alvarado JL, Nestor PG, Rosow L, Pelavin PE, McCarley RW, et al. Fractional anisotropy and radial diffusivity: diffusion measures of white matter abnormalities in the anterior limb of the internal capsule in schizophrenia. *Schizophr Res*. 2012; 136(1-3):55–62.
25. Domen PA, Michielse S, Gronenschild E, Habets P, Roebroek A, Schruers K, et al. Microstructural white matter alterations in psychotic disorder: a family-based diffusion tensor imaging study. *Schizophr Res*. 2013; 146(1–3):291–300. <https://doi.org/10.1016/j.schres.2013.03.002> PMID: [23523694](https://pubmed.ncbi.nlm.nih.gov/23523694/)
26. Li J, Kale Edmiston E, Chen K, Tang Y, Ouyang X, Jiang Y, et al. A comparative diffusion tensor imaging study of corpus callosum subregion integrity in bipolar disorder and schizophrenia. *Psychiatry Res*. 2014 Jan 30; 221(1):58–62. <https://doi.org/10.1016/j.psychres.2013.10.007> PMID: [24300086](https://pubmed.ncbi.nlm.nih.gov/24300086/)
27. Reid MA, White DM, Kraguljac NV, Lahti AC. A combined diffusion tensor imaging and magnetic resonance spectroscopy study of patients with schizophrenia. *Schizophr Res*. 2016; 170(2–3):341–50. <https://doi.org/10.1016/j.schres.2015.12.003> PMID: [26718333](https://pubmed.ncbi.nlm.nih.gov/26718333/)
28. Nakamura K, Kawasaki Y, Takahashi T, Furuichi A, Noguchi K, Seto H, et al. Reduced white matter fractional anisotropy and clinical symptoms in schizophrenia: a voxel-based diffusion tensor imaging study. *Psychiatry Res*. 2012; 202(3):233–8. <https://doi.org/10.1016/j.psychres.2011.09.006> PMID: [22819228](https://pubmed.ncbi.nlm.nih.gov/22819228/)
29. Camchong J, MacDonald AW, Bell C, Mueller BA, Lim KO. Altered functional and anatomical connectivity in schizophrenia. *Schizophr Bull*. 2011; 37(3):640–50. <https://doi.org/10.1093/schbul/sbp131> PMID: [19920062](https://pubmed.ncbi.nlm.nih.gov/19920062/)
30. Koch K, Wagner G, Schachtzabel C, Schultz CC, Güllmar D, Reichenbach JR, et al. Neural activation and radial diffusivity in schizophrenia: combined fMRI and diffusion tensor imaging study. *Br J Psychiatry*. 2011; 198(3):223–9. <https://doi.org/10.1192/bjp.bp.110.081836> PMID: [21357881](https://pubmed.ncbi.nlm.nih.gov/21357881/)
31. Knöchel C, Reuter J, Reinke B, Stäblein M, Marbach K, Feddern R, et al. Cortical thinning in bipolar disorder and schizophrenia. *Schizophr Res*. 2016. 172, 1–3:78–85. <https://doi.org/10.1016/j.schres.2016.02.007> PMID: [26876312](https://pubmed.ncbi.nlm.nih.gov/26876312/)
32. Tomasino B, Bellani M, Perlini C, Rambaldelli G, Cerini R, Isola M, et al. Altered microstructure integrity of the amygdala in schizophrenia: a bimodal MRI and DWI study. *Psychol Med*. 2011; 41(2):301–11. <https://doi.org/10.1017/S0033291710000875> PMID: [20459886](https://pubmed.ncbi.nlm.nih.gov/20459886/)
33. Spoletini I, Cherubini A, Banfi G, Rubino IA, Peran P, Caltagirone C, et al. Hippocampi, thalami, and accumbens microstructural damage in schizophrenia: a volumetry, diffusivity, and neuropsychological study. *Schizophr Bull*. 2011; 37(1):118–30. <https://doi.org/10.1093/schbul/sbp058> PMID: [19542526](https://pubmed.ncbi.nlm.nih.gov/19542526/)
34. Bellani M, Yeh PH, Tansella M, Balestrieri M, Soares JC, Brambilla P. DTI studies of corpus callosum in bipolar disorder. *Biochem Soc Trans*. 2009; 37(5):1096–8
35. Bellani M, Marzi CA, Savazzi S, Perlini C, Cerruti S, Ferro A, et al. Laterality effects in schizophrenia and bipolar disorder. *Exp Brain Res*. 2010; 201(2):339–44. <https://doi.org/10.1007/s00221-009-2021-0> PMID: [19795112](https://pubmed.ncbi.nlm.nih.gov/19795112/)
36. Versace A, Andreazza AC, Young LT, Fournier JC, Almeida JR, Stiffler RS, et al. Elevated serum measures of lipid peroxidation and abnormal prefrontal white matter in euthymic bipolar adults: toward peripheral biomarkers of bipolar disorder. *Mol Psychiatry*. 2014; 19(2):200–8. <https://doi.org/10.1038/mp.2012.188> PMID: [23358158](https://pubmed.ncbi.nlm.nih.gov/23358158/)
37. Sussmann JE, Lymer GK, McKirdy J, Moorhead TW, Muñoz Maniega S, Job D, et al. White matter abnormalities in bipolar disorder and schizophrenia detected using diffusion tensor magnetic resonance imaging. *Bipolar Disord*. 2009; 11(1):11–8. <https://doi.org/10.1111/j.1399-5618.2008.00646.x> PMID: [19133962](https://pubmed.ncbi.nlm.nih.gov/19133962/)
38. Torgerson CM, Irimia A, Leow AD, Bartzokis G, Moody TD, Jennings RG, et al. DTI tractography and white matter fiber tract characteristics in euthymic bipolar I patients and healthy control subjects. *Brain Imaging Behav*. 2013; 7(2):129–39. <https://doi.org/10.1007/s11682-012-9202-3> PMID: [23070746](https://pubmed.ncbi.nlm.nih.gov/23070746/)
39. Bauer IE, Ouyang A, Mwangi B, Sanches M, Zunta-Soares GB, Keefe RS, et al. Reduced WM integrity and verbal fluency impairment in young adults with bipolar disorder: a diffusion tensor imaging study. *J Psychiatr Res*. 2015 Mar; 62:115–22. <https://doi.org/10.1016/j.jpsychires.2015.01.008> PMID: [25684152](https://pubmed.ncbi.nlm.nih.gov/25684152/)
40. Maller JJ, Thaveenthiran P, Thomson RH, McQueen S, Fitzgerald PB. Volumetric, cortical thickness and white matter integrity alterations in bipolar disorder type I and II. *J Affect Disord*. 2014 Dec; 169:118–27. <https://doi.org/10.1016/j.jad.2014.08.016> PMID: [25189991](https://pubmed.ncbi.nlm.nih.gov/25189991/)
41. Haller S, Xekardaki A, Delaloye C, Canuto A, Lövlblad KO, Gold G, et al. Combined analysis of grey matter voxel-based morphometry and white matter tract-based spatial statistics in late-life bipolar



- disorder. *J Psychiatry Neurosci*. 2011 Nov; 36(6):391–401. <https://doi.org/10.1503/jpn.100140> PMID: 21284917
42. Macritchie KA, Gallagher P, Lloyd AJ, Bastin ME, Vasudev K, Marshall I, et al. Periventricular white matter integrity and cortisol levels in healthy controls and in euthymic patients with bipolar disorder: an exploratory analysis. *J Affect Disord*. 2013; 148(2–3):249–55. <https://doi.org/10.1016/j.jad.2012.12.002> PMID: 23399478
  43. Beyer JL, Taylor WD, MacFall JR, Kuchibhatla M, Payne ME, Provenzale JM, et al. Cortical white matter microstructural abnormalities in bipolar disorder. *Neuropsychopharmacology*. 2005; 30(12):2225–9. <https://doi.org/10.1038/sj.npp.1300802> PMID: 15988474
  44. Emsell L, Leemans A, Langan C, Van Hecke W, Barker GJ, McCarthy P, et al. Limbic and callosal white matter changes in euthymic bipolar I disorder: an advanced diffusion magnetic resonance imaging tractography study. *Biol Psychiatry*. 2013; 73(2):194–201. <https://doi.org/10.1016/j.biopsych.2012.09.023> PMID: 23158457
  45. Smith SM, Jenkinson M, Johansen-Berg H, Rueckert D, Nichols TE, Mackay CE, et al. Tract-based spatial statistics: voxelwise analysis of multi-subject diffusion data. *Neuroimage*. 2006. 31, 4:1487–505. <https://doi.org/10.1016/j.neuroimage.2006.02.024> PMID: 16624579
  46. Nortje G, Stein DJ, Radua J, Mataix-Cols D, Horn N. Systematic review and voxel-based meta-analysis of diffusion tensor imaging studies in bipolar disorder. *J Affect Disord*. 2013 Sep 5; 150(2):192–200. <https://doi.org/10.1016/j.jad.2013.05.034> PMID: 23810479
  47. Scheel M, Prokscha T, Bayerl M, Gallinat J, Montag C. Myelination deficits in schizophrenia: evidence from diffusion tensor imaging. *Brain Struct Funct*. 2013; 218(1):151–6. <https://doi.org/10.1007/s00429-012-0389-2> PMID: 22327232
  48. Roalf DR, Ruparel K, Verma R, Elliott MA, Gur RE, Gur RC. White matter organization and neurocognitive performance variability in schizophrenia. *Schizophr Res*. 2013; 143(1):172–8. <https://doi.org/10.1016/j.schres.2012.10.014> PMID: 23148898
  49. Kumar J, Iwabuchi S, Oowise S, Balain V, Palaniyappan L, Liddle PF. Shared white-matter dysconnectivity in schizophrenia and bipolar disorder with psychosis. *Psychol Med*. 2015; 45(4):759–70. <https://doi.org/10.1017/S0033291714001810> PMID: 25089761
  50. Benedetti F, Yeh PH, Bellani M, Radaelli D, Nicoletti MA, Poletti S, et al. Disruption of white matter integrity in bipolar depression as a possible structural marker of illness. *Biol Psychiatry*. 2011; 69(4):309–17. <https://doi.org/10.1016/j.biopsych.2010.07.028> PMID: 20926068
  51. Knöchel C, Oertel-Knöchel V, Schönmeier R, Rotarska-Jagiela A, van de Ven V, Prvulovic D, et al. Interhemispheric hypoconnectivity in schizophrenia: fiber integrity and volume differences of the corpus callosum in patients and unaffected relatives. *Neuroimage*. 2012 Jan 16; 59(2):926–34. <https://doi.org/10.1016/j.neuroimage.2011.07.088> PMID: 21964509
  52. McIntosh AM, Muñoz Maniega S, Lymer GK, McKirdy J, Hall J, Sussmann JE, et al. White matter tractography in bipolar disorder and schizophrenia. *Biol Psychiatry*. 2008; 64(12):1088–92. <https://doi.org/10.1016/j.biopsych.2008.07.026> PMID: 18814861
  53. Skudlarski P, Schretlen DJ, Thaker GK, Stevens MC, Keshavan MS, Sweeney JA, et al. Diffusion tensor imaging white matter endophenotypes in patients with schizophrenia or psychotic bipolar disorder and their relatives. *Am J Psychiatry*. 2013; 170(8):886–98. <https://doi.org/10.1176/appi.ajp.2013.12111448> PMID: 23771210
  54. Lu LH, Zhou XJ, Keedy SK, Reilly JL, Sweeney JA. White matter microstructure in untreated first episode bipolar disorder with psychosis: comparison with schizophrenia. *Bipolar Disord*. 2011; 13(7–8):604–13. <https://doi.org/10.1111/j.1399-5618.2011.00958.x> PMID: 22085473
  55. Tansella M, Burti L. Integrating evaluative research and community-based mental health care in Verona, Italy. *Br J Psychiatry*. 2003; 183:167–9. PMID: 12893671
  56. Smith SM, Jenkinson M, Woolrich MW, Beckmann CF, Behrens TE, Johansen-Berg H, et al. Advances in functional and structural MR image analysis and implementation as FSL. *Neuroimage*. 2004; 23, Suppl 1:S208–19.
  57. Woolrich MW, Jbabdi S, Patenaude B, Chappell M, Makni S, Behrens T, et al. Bayesian analysis of neuroimaging data in FSL. *Neuroimage*. 2009; 45,1 Suppl:S173–86. <https://doi.org/10.1016/j.neuroimage.2008.10.055> PMID: 19059349
  58. Smith SM. Fast robust automated brain extraction. *Hum Brain Mapp*. 2002; 17(3):143–55. <https://doi.org/10.1002/hbm.10062> PMID: 12391568
  59. Behrens TE, Woolrich MW, Jenkinson M, Johansen-Berg H, Nunes RG, Clare S, et al. Characterization and propagation of uncertainty in diffusion-weighted MR imaging. *Magn Reson Med*. 2003; 50(5):1077–88. <https://doi.org/10.1002/mrm.10609> PMID: 14587019

60. Behrens TE, Berg HJ, Jbabdi S, Rushworth MF, Woolrich MW. Probabilistic diffusion tractography with multiple fibre orientations: What can we gain?. *Neuroimage*. 2007; 34(1):144–55. <https://doi.org/10.1016/j.neuroimage.2006.09.018> PMID: 17070705
61. Andersson J.L., Smith S.M., Jenkinson M. FNIRT—FMRIB’s non-linear image registration tool. *Organ. Hum. Brain Mapp*. 2008
62. Winkler AM, Ridgway GR, Webster MA, Smith SM, Nichols TE. Permutation inference for the general linear model. *Neuroimage*. 2014. 92:381–97. <https://doi.org/10.1016/j.neuroimage.2014.01.060> PMID: 24530839
63. Nichols TE, Holmes AP. Nonparametric permutation tests for functional neuroimaging: a primer with examples. *Hum Brain Mapp*. 2002; 15(1):1–25. PMID: 11747097
64. Fitzsimmons J, Kubicki M, Shenton ME. Review of functional and anatomical brain connectivity findings in schizophrenia. *Curr Opin Psychiatry*. 2013; 26(2):172–87 <https://doi.org/10.1097/YCO.0b013e32835d9e6a> PMID: 23324948
65. Ivleva EI, Morris DW, Moates AF, Suppes T, Thaker GK, Tamminga CA. Genetics and intermediate phenotypes of the schizophrenia—bipolar disorder boundary. *Neurosci Biobehav Rev*. 2010; 34, 6:897–921. <https://doi.org/10.1016/j.neubiorev.2009.11.022> PMID: 19954751
66. Tamminga CA, Ivleva EI, Keshavan MS, Pearlson GD, Clementz BA, Witte, et al. Clinical phenotypes of psychosis in the Bipolar-Schizophrenia Network on Intermediate Phenotypes (B-SNIP). *Am J Psychiatry*. 2013; 170, 11:1263–74. <https://doi.org/10.1176/appi.ajp.2013.12101339> PMID: 23846857
67. Maggioni E, Altamura AC, Brambilla P. Exploring the neuroanatomical bases of psychotic features in bipolar disorder, *Epidemiology and Psychiatric Sciences*. 2017. in press.
68. Karbasforoushan, Duffy B., Blackford JU, Woodward ND. Processing speed impairment in schizophrenia is mediated by white matter integrity. *Psychological Medicine*. 2015. 45, pp 109–120. <https://doi.org/10.1017/S0033291714001111> PMID: 25066842
69. Wagner G, De la Cruz F, Schachtzabel C, Güllmar D, Schultz CC, Schlösser RG, et al. Structural and functional dysconnectivity of the fronto-thalamic system in schizophrenia: a DCM-DTI study. *Cortex*. 2015 May; 66:35–45. <https://doi.org/10.1016/j.cortex.2015.02.004> PMID: 25797657
70. Zhou Y, Fan L, Qiu C, Jiang T. Prefrontal cortex and the dysconnectivity hypothesis of schizophrenia. *Neurosci Bull*. 2015 Apr; 31(2):207–19. <https://doi.org/10.1007/s12264-014-1502-8> PMID: 25761914
71. Oertel-Knöchel V, Reinke B, Alves G, Jurcoane A, Wenzler S, Prvulovic D, et al. Frontal white matter alterations are associated with executive cognitive function in euthymic bipolar patients. *J Affect Disord*. 2014. 155:223–33. <https://doi.org/10.1016/j.jad.2013.11.004> PMID: 24295601
72. Mamah D., Conturo T. E., Harms M. P., Akbudak E., Wang L., McMichael A. R et al- Anterior thalamic radiation integrity in schizophrenia: a diffusion-tensor imaging study. *Psychiatry Research: Neuroimaging*. 2010. 183(2), 144–150. <https://doi.org/10.1016/j.psychres.2010.04.013> PMID: 20619618
73. Brambilla P, Nicoletti MA, Sassi RB, Mallinger AG, Frank E, Kupfer DJ et al. Magnetic resonance imaging study of corpus callosum abnormalities in patients with bipolar disorder. *Biol Psychiatry*. 2003; 54 (11):1294–7. PMID: 14643097
74. Brambilla P, Nicoletti M, Sassi RB, Mallinger AG, Frank E, Keshavan MS et al. Corpus callosum signal intensity in patients with bipolar and unipolar disorder. *J Neurol Neurosurg Psychiatr*. 2004; 75(2):221–5. PMID: 14742592
75. Brambilla P, Tansella M. The role of white matter for the pathophysiology of schizophrenia. *Int Rev Psychiatry* 2007; 19(4):459–68. <https://doi.org/10.1080/09540260701500975> PMID: 17671878
76. Florio V, Savazzi S, Conca A, Marzi CA. Differential impairment of interhemispheric transmission in bipolar disease. *Exp Brain Res*. 2013; 230(2):175–85. <https://doi.org/10.1007/s00221-013-3642-x> PMID: 23857169
77. Perlini C, Marini A, Garzitto M, Isola M, Cerruti S, Marinelli V, et al. Linguistic production and syntactic comprehension in schizophrenia and bipolar disorder. *Acta Psychiatr Scand*. 2012. 126, 5:363–76. <https://doi.org/10.1111/j.1600-0447.2012.01864.x> PMID: 22509998
78. Duncan J, Owen AM. Common regions of the human frontal lobe recruited by diverse cognitive demands. *Trends Neurosci*. 2000. 23, 10:475–83. PMID: 11006464
79. Brambilla P, Bellani M, Yeh PH, Soares JC, Tansella M. White matter connectivity in bipolar disorder. *Int Rev Psychiatry*. 2009; 21(4):380–6. <https://doi.org/10.1080/09540260902962172> PMID: 20374151
80. Kubicki M, Westin CF, Maier SE, Frumin M, Nestor PG, Salisbury DF, et al. Uncinate fasciculus findings in schizophrenia: a magnetic resonance diffusion tensor imaging study. *Am J Psychiatry*. 2002; 159 (5):813–20. <https://doi.org/10.1176/appi.ajp.159.5.813> PMID: 11986136
81. Ashtari M, Cottone J, Ardekani BA, Cervellione K, Szeszko PR, Wu J, et al. Disruption of white matter integrity in the inferior longitudinal fasciculus in adolescents with schizophrenia as revealed by fiber

- tractography. *Arch Gen Psychiatry*. 2007; 64(11):1270–80. <https://doi.org/10.1001/archpsyc.64.11.1270> PMID: 17984396
82. Lee SH, Kubicki M, Asami T, Seidman LJ, Goldstein JM, Meshulam-Gately RI, et al. Extensive white matter abnormalities in patients with first-episode schizophrenia: a Diffusion Tensor Imaging (DTI) study. *Schizophr Res*. 2013; 143(2–3):231–8. <https://doi.org/10.1016/j.schres.2012.11.029> PMID: 23290268
  83. Song SK, Yoshino J, Le TQ, Lin SJ, Sun SW, Cross AH, et al. Demyelination increases radial diffusivity in corpus callosum of mouse brain. *Neuroimage*. 2005; 26(1):132–40. <https://doi.org/10.1016/j.neuroimage.2005.01.028> PMID: 15862213
  84. Liu X, Lai Y, Wang X, Hao C, Chen L, Zhou Z, et al. Reduced white matter integrity and cognitive deficit in never-medicated chronic schizophrenia: a diffusion tensor study using TBSS. *Behav Brain Res*. 2013; 252:157–63. <https://doi.org/10.1016/j.bbr.2013.05.061> PMID: 23747517
  85. Barnea-Goraly N, Chang KD, Karchemskiy A, Howe ME, Reiss AL. Limbic and corpus callosum aberrations in adolescents with bipolar disorder: a tract-based spatial statistics analysis. *Biol Psychiatry*. 2009; 66(3):238–44. <https://doi.org/10.1016/j.biopsych.2009.02.025> PMID: 19389661
  86. Roybal DJ, Barnea-Goraly N, Kelley R, Bararpour L, Howe ME, Reiss AL, et al. Widespread white matter tract aberrations in youth with familial risk for bipolar disorder. *Psychiatry Res*. 2015. 232, 2:184–92. <https://doi.org/10.1016/j.psychres.2015.02.007> PMID: 25779034
  87. Magioncalda P, Martino M, Conio B, Piaggio N, Teodorescu R, Escelsior A, et al. Patterns of microstructural white matter abnormalities and their impact on cognitive dysfunction in the various phases of type I bipolar disorder. *J Affect Disord*. 2016. 193:39–50. <https://doi.org/10.1016/j.jad.2015.12.050> PMID: 26766032
  88. Cosgrove VE, Suppes T. Informing DSM-5: biological boundaries between bipolar I disorder, schizoaffective disorder, and schizophrenia. *BMC Med*. 2013 14;11:127.
